# Supplementary figures and images for: Immunologic landscape of human hepatic hemangiomas and epithelioid hemangioendotheliomas
Source: PubMed Central journal article supplement — Hepatol Commun. 2024 Jan 11;8(1):e0359. doi: 10.1097/HC9.0000000000000359 (PMC10786595; doi:10.1097/hc9.0000000000000359), 2024-01-11

# Supplemental Figure 1

A.

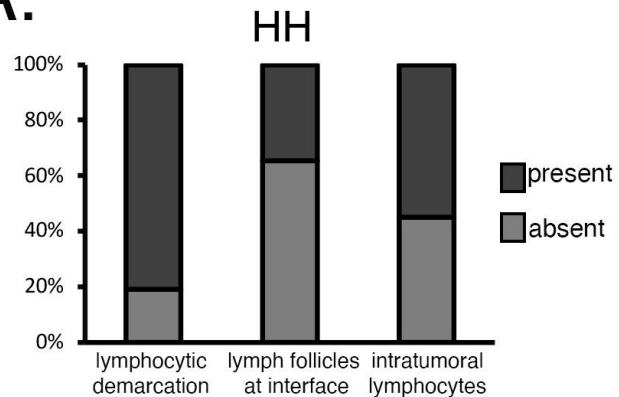

B.

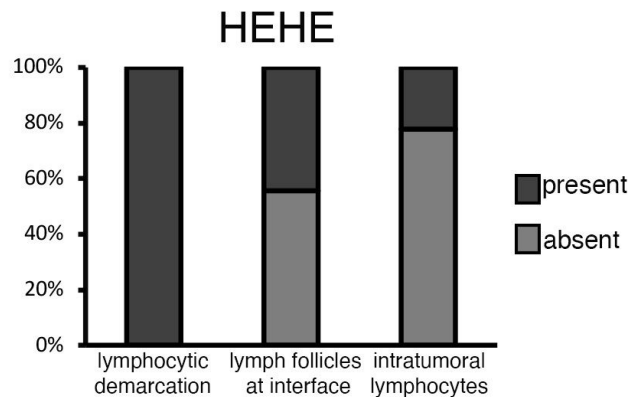

C.

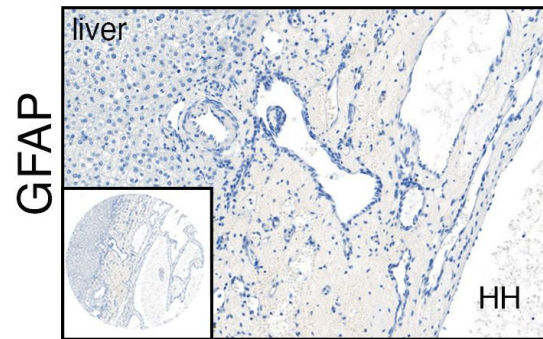

# Supplemental Figure 2

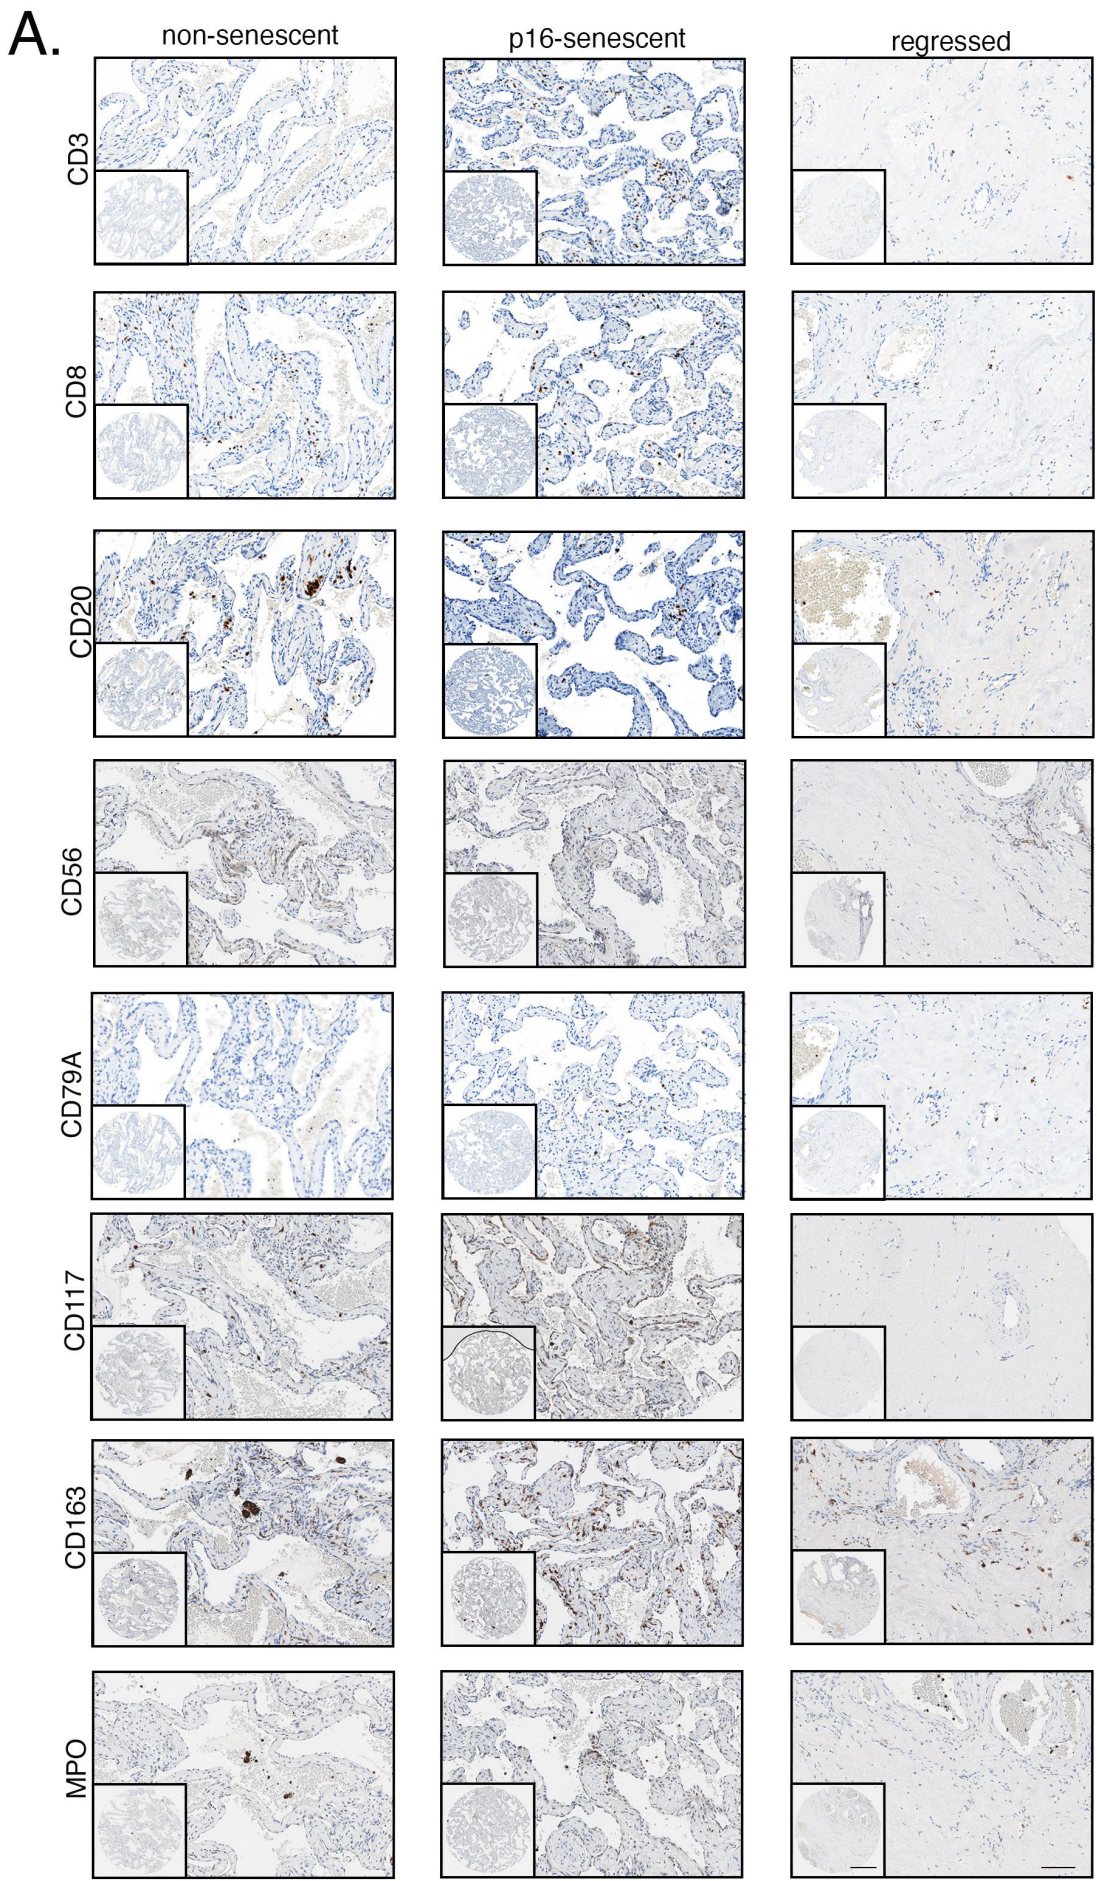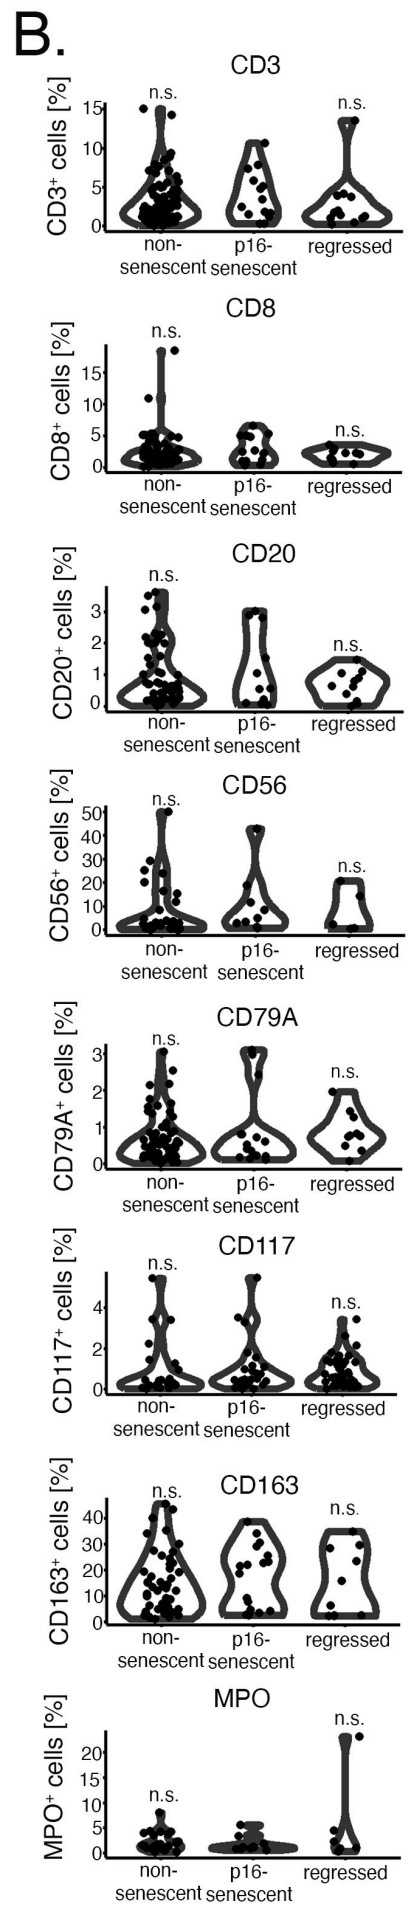

# Supplemental Figure 3

## A.

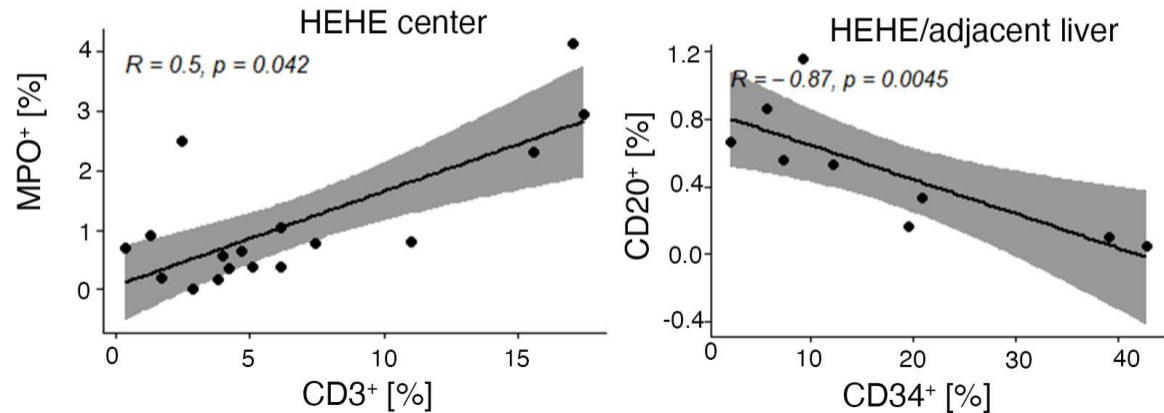

## B.

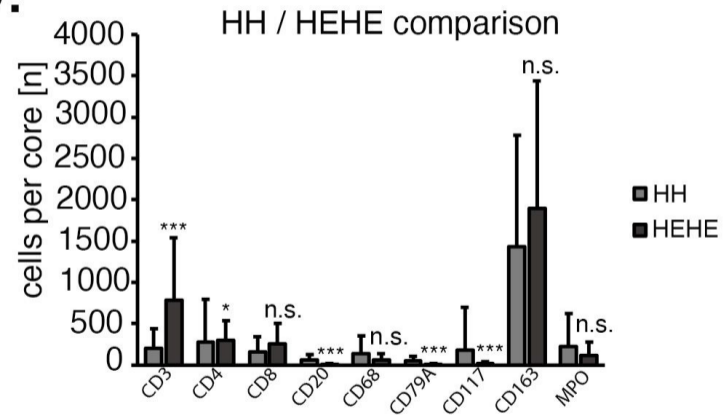

Supplement: hc9-8-e0359-s001.pdf [file hc9-8-e0359-s001.pdf]
